# Supplementary material for: A Population-Structured HIV Epidemic in Israel: Roles of Risk and Ethnicity
Source: PubMed Central journal article supplement (PMC4547742; doi:10.1371/journal.pone.0135061), 2015-08-24

# Total N=1427

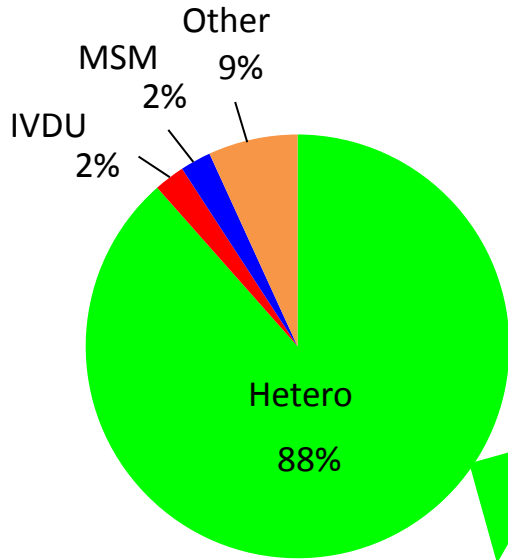

| Origin    | N   | Percent |
|-----------|-----|---------|
| Ethiopian | 377 | 89      |
| FSU       | 10  | 2       |
| Israeli   | 24  | 6       |
| Other     | 14  | 3       |

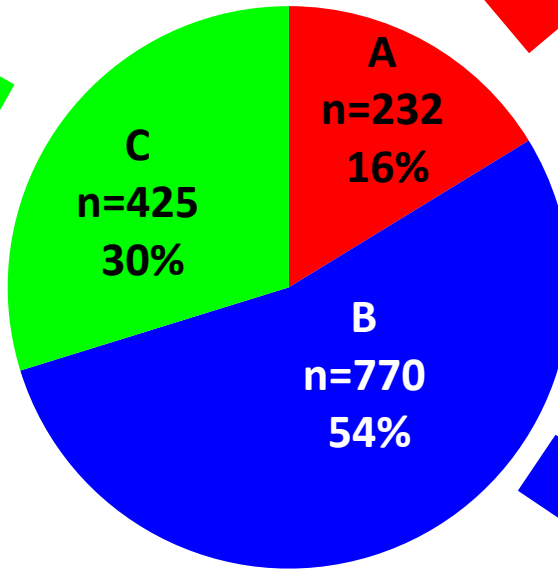

| Origin    | N   | Percent |
|-----------|-----|---------|
| Ethiopian | 2   | 0.3     |
| FSU       | 100 | 13      |
| Israeli   | 564 | 73      |
| Other     | 104 | 14      |

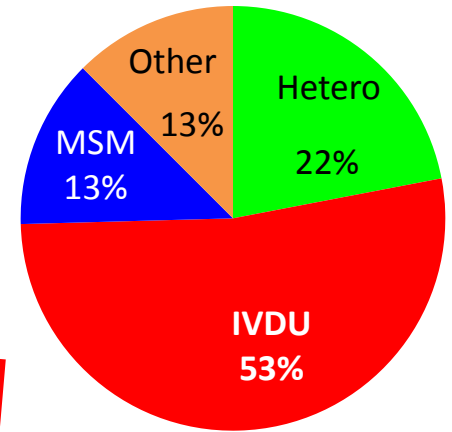

| Origin    | N   | Percent |
|-----------|-----|---------|
| Ethiopian | 3   | 1.3     |
| FSU       | 165 | 71      |
| Israeli   | 41  | 18      |
| Other     | 23  | 10      |

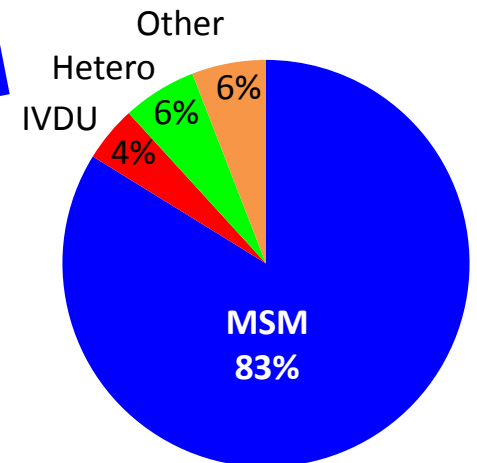

Supplement: pone.0135061.s001.pdf [file pone.0135061.s001.pdf]
