# Supplementary material for: A Population-Structured HIV Epidemic in Israel: Roles of Risk and Ethnicity
Source: PubMed Central journal article supplement (PMC4547742; doi:10.1371/journal.pone.0135061), 2015-08-24
Supplement: pone.0135061.s002.pdf [file pone.0135061.s002.pdf]

## Number of newly diagnosed patients

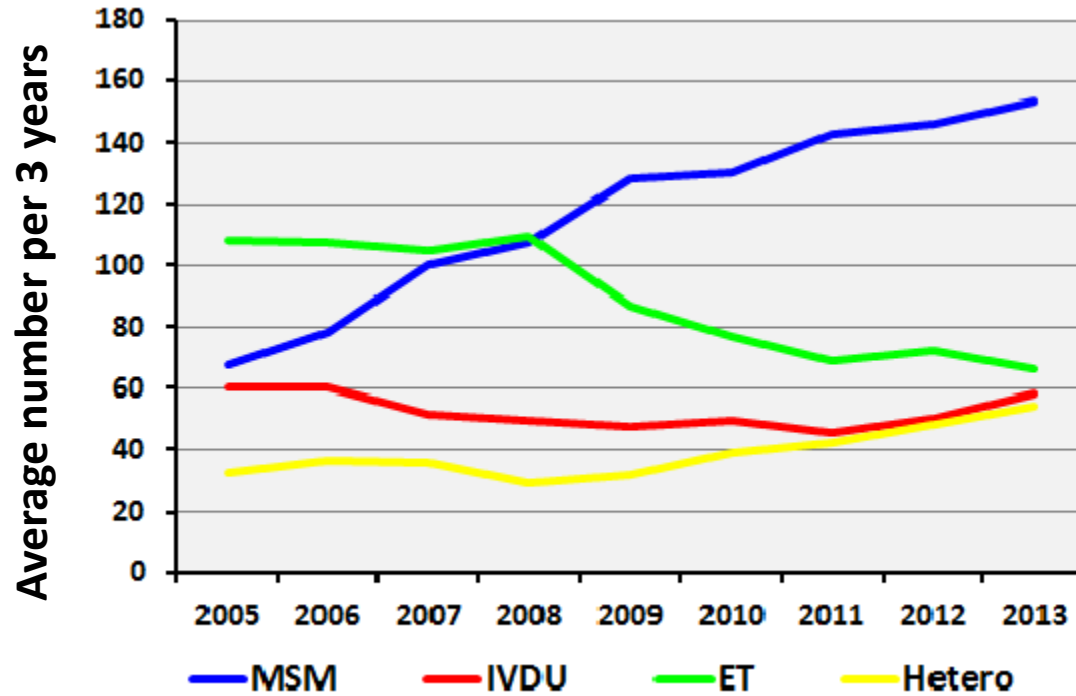

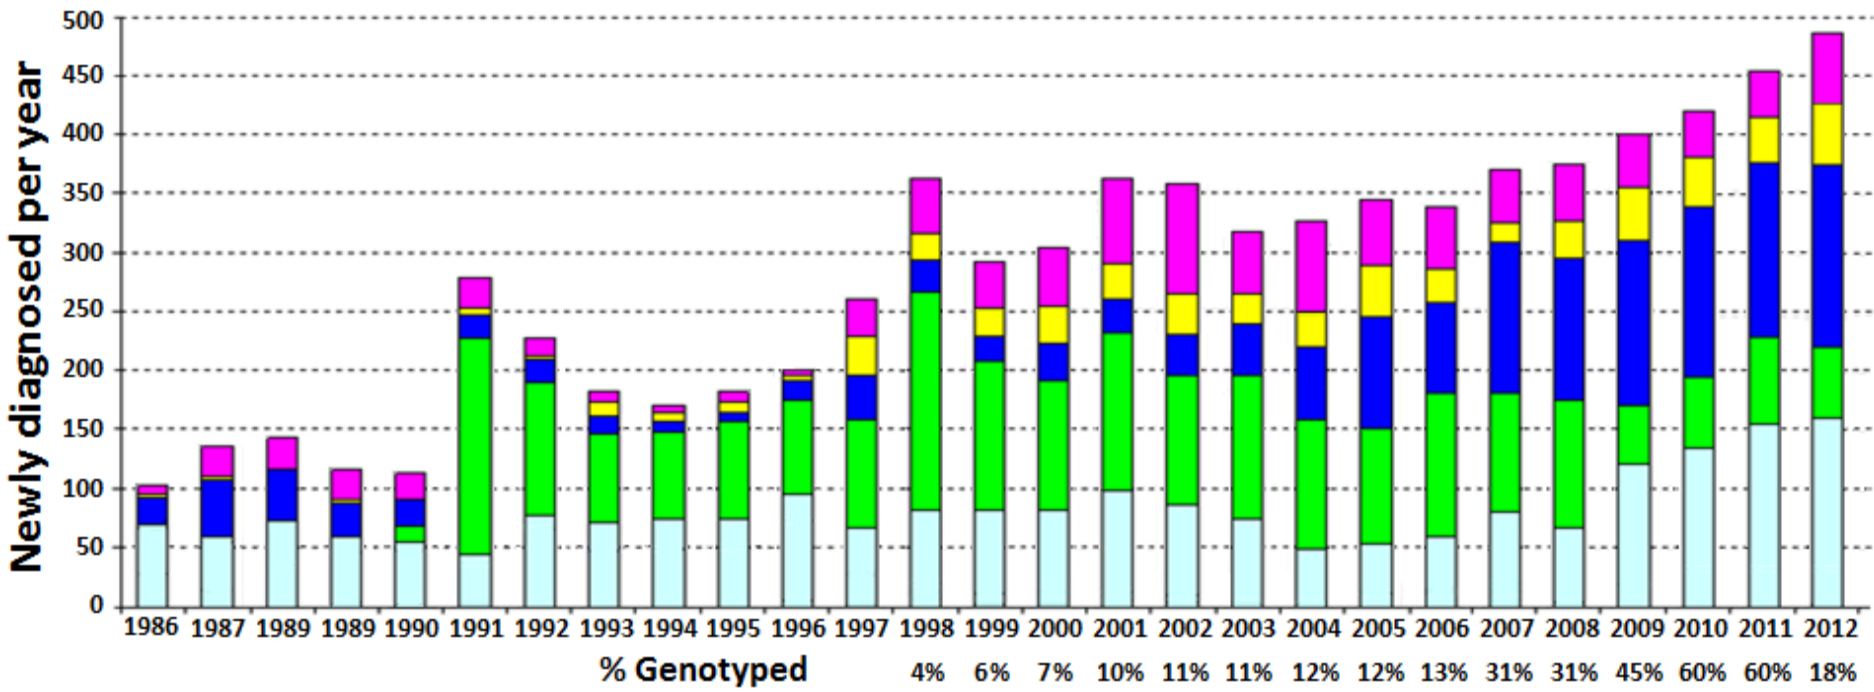

- MSM
- Et
- Unknown/Foreigners/Others
- HETERO
- IVDU
