# Supplementary material for: A Population-Structured HIV Epidemic in Israel: Roles of Risk and Ethnicity
Source: PubMed Central journal article supplement (PMC4547742; doi:10.1371/journal.pone.0135061), 2015-08-24
Supplement: pone.0135061.s003.pdf [file pone.0135061.s003.pdf]

# Hetero

n=453

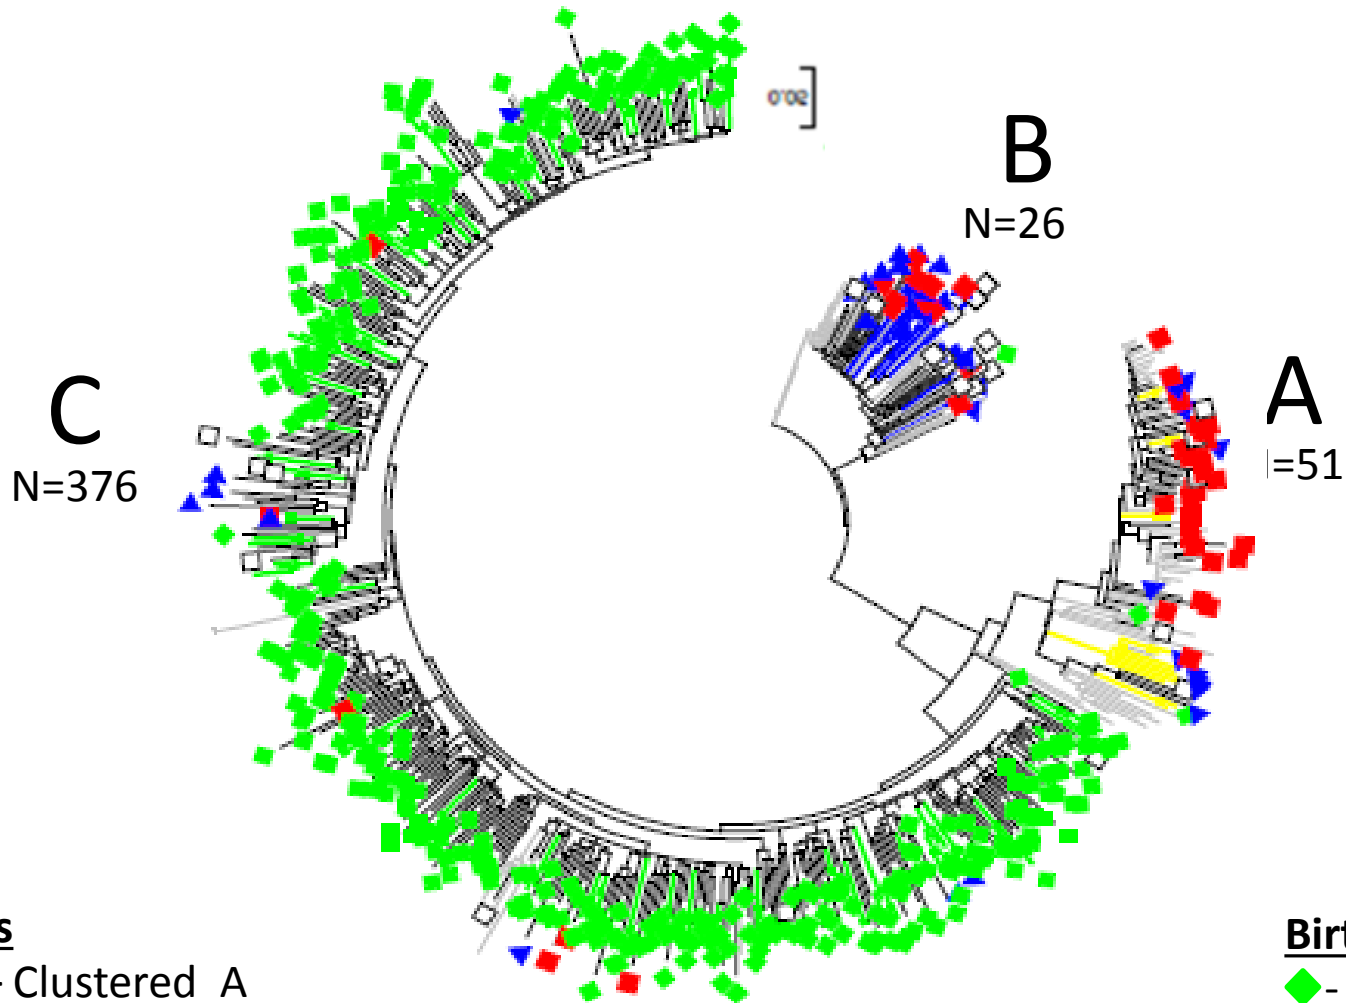

## Clusters

- Clustered A
- Clustered B
- Clustered C
- Reference sequences (Los-Alamos DB)

## Birth Place

- ◆ - Ethiopia
- - FSU
- ▲ - Israel
- - Other

# IVDU

n=169

**A**  
N=123

**B**  
N=36

**C**  
N=10

## Clusters

- – Clustered A
- – Clustered B
- – Clustered C
- – Reference sequences (Los-Alamos DB)

## Birth Place

- ◆ - Ethiopia
- - FSU
- ▲ - Israel
- - Other

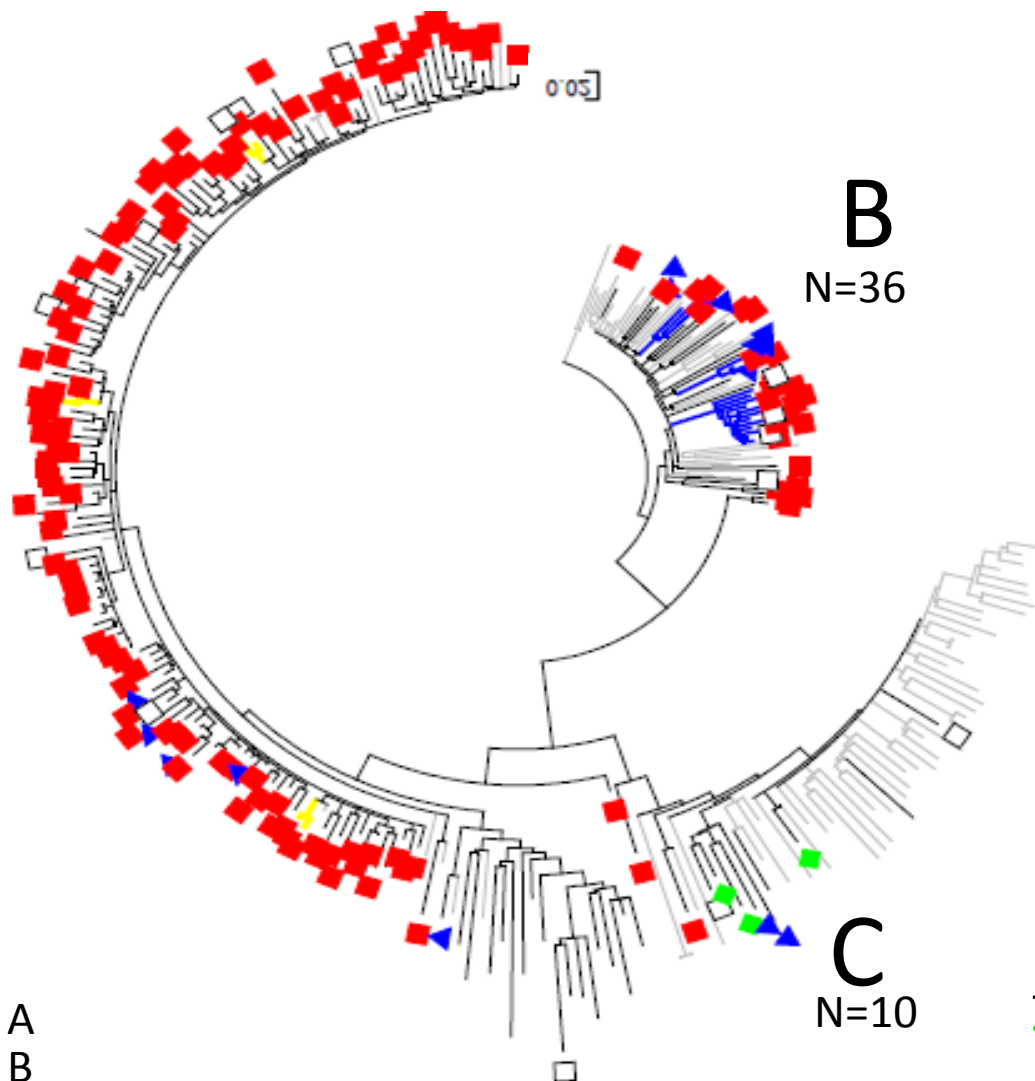

# MSM

N=677

**B**  
N=638

**C**  
N=10

**A**  
N=29

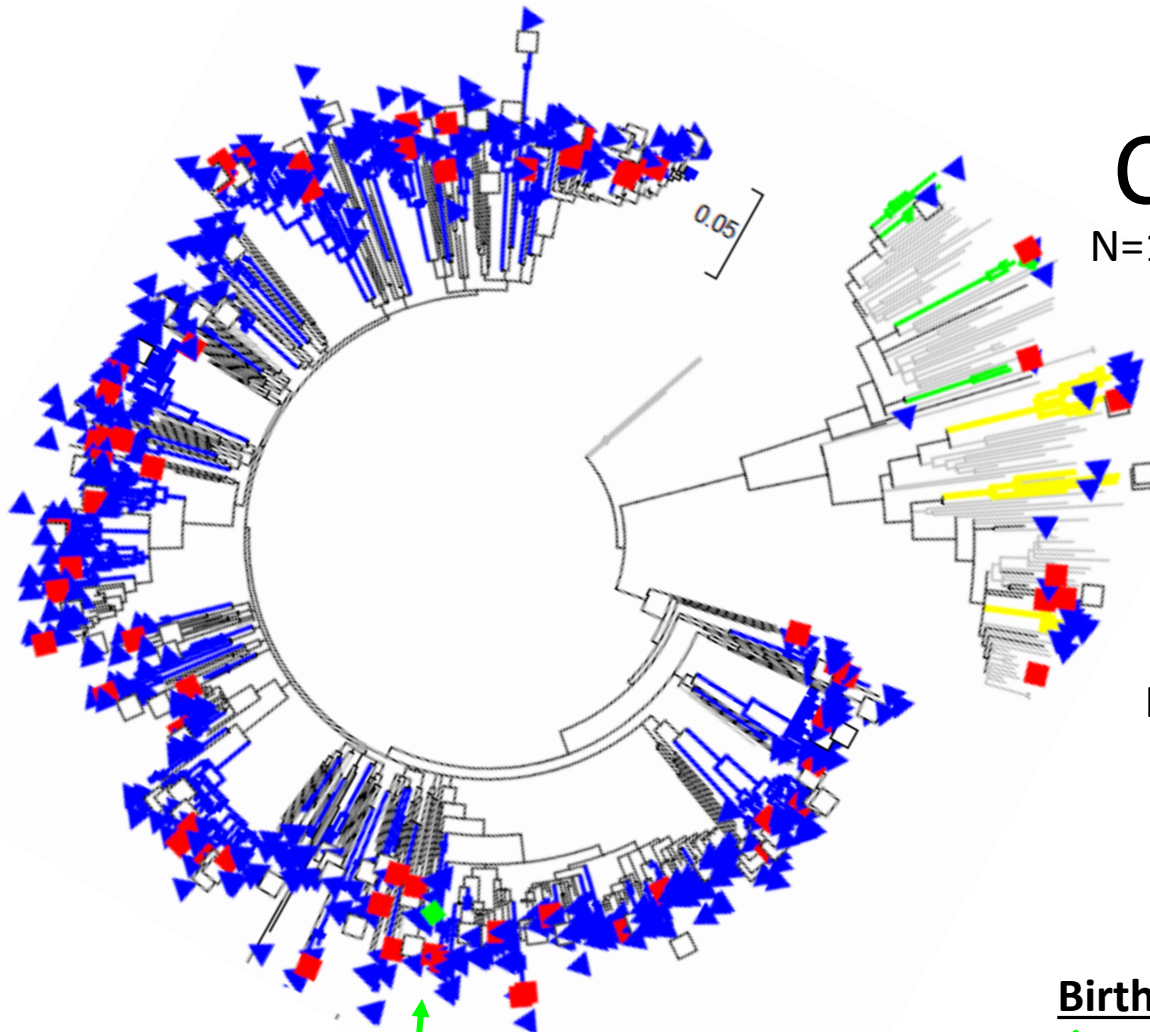

## Clusters

- Clustered A
- Clustered B
- Clustered C
- Reference sequences (Los-Alamos DB)

## Birth Place

- ◆ - Ethiopia
- - FSU
- ▲ - Israel
- - Other
