# Supplementary material for: A Population-Structured HIV Epidemic in Israel: Roles of Risk and Ethnicity
Source: PubMed Central journal article supplement (PMC4547742; doi:10.1371/journal.pone.0135061), 2015-08-24
Supplement: pone.0135061.s004.pdf [file pone.0135061.s004.pdf]

# 251\_2001 A1/C

Name: 251\_2001 Length: 907

Assignment: Recombinant of C, A1 Bootstrap: NA

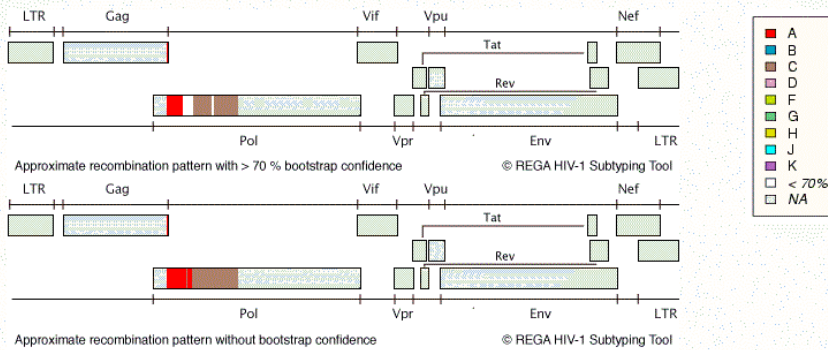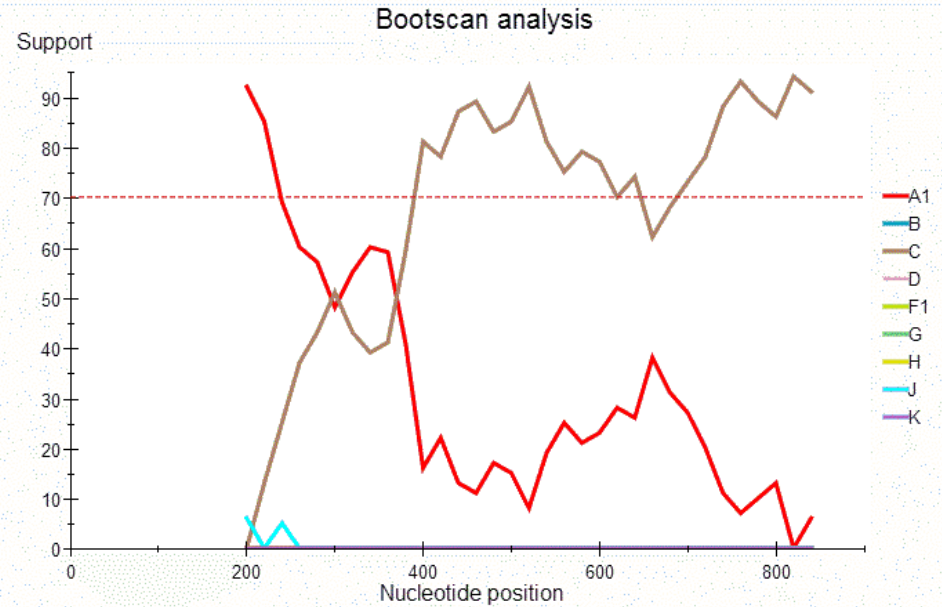

Your sequence starts at position 2383 and finishes at position 3290 relative to the reference sequence.

Motivation: Rule 2a

# 1102\_1998\_CRF 62-BC

Name: 1102\_1998 Length: 920

Assignment: Recombinant of B, C Bootstrap: NA

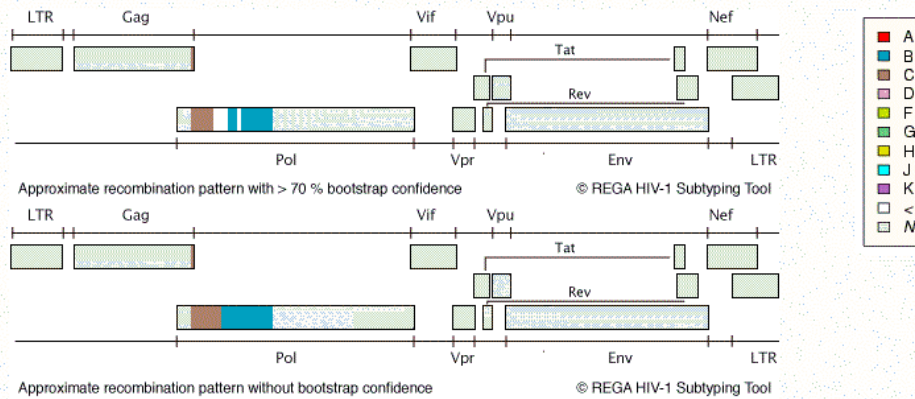

Your sequence starts at position 2370 and finishes at position 3290 relative to the reference sequence.

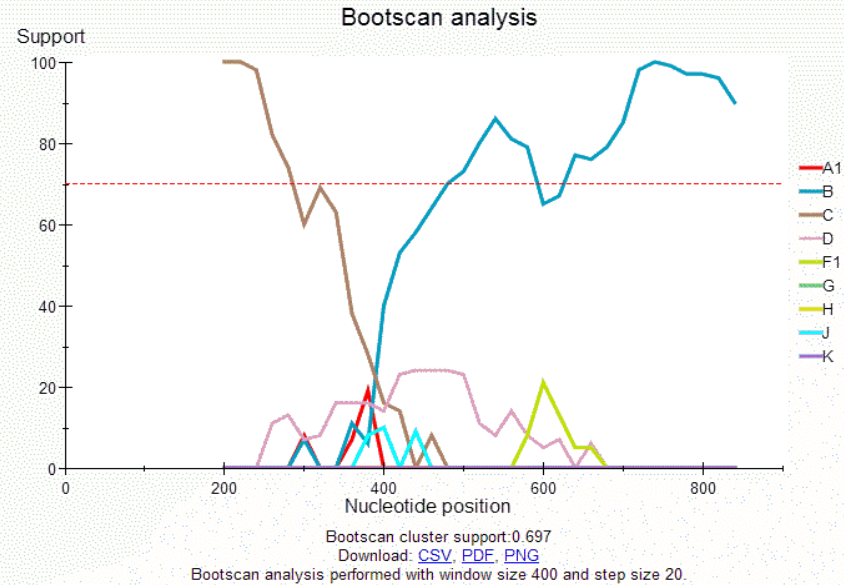

Recombination profile:

- short: C - B
- long: C C C C C - - - - - B B B B B B - - B B B B B B B B B B
- best: C C C C C C C C C C B B B B B B B B B B B B B B B B B B B B B B
